# Supplementary material for: Identification and Characterization of LRR-RLK Family Genes in Potato Reveal Their Involvement in Peptide Signaling of Cell Fate Decisions and Biotic/Abiotic Stress Responses
Source: MDPI journal article supplement (doi:10.3390/cells7090120), 2018-08-27
Supplement: s1 [file s1]

| Names        | Gene ID              | pI   | Mw<br>(kDa) | ORF<br>(bp) | Protein<br>Length<br>(aa) | Group | Signal<br>Peptide |
|--------------|----------------------|------|-------------|-------------|---------------------------|-------|-------------------|
| StLRR-RLK001 | PGSC0003DMT400055038 | 5.76 | 10444.29    | 2868        | 955                       | XII   | √                 |
| StLRR-RLK002 | PGSC0003DMT400042178 | 6.27 | 112158.66   | 3042        | 1013                      | VIII  | √                 |
| StLRR-RLK003 | PGSC0003DMT400002647 | 7.75 | 132546.48   | 3603        | 1200                      | XI    | √                 |
| StLRR-RLK004 | PGSC0003DMT400016060 | 7.22 | 105911.52   | 2883        | 960                       | IX    | √                 |
| StLRR-RLK005 | PGSC0003DMT400046249 | 8.93 | 70435.07    | 1914        | 637                       | I     | √                 |
| StLRR-RLK006 | PGSC0003DMT400066895 | 8.12 | 75443.54    | 2061        | 686                       | III   | √                 |
| StLRR-RLK007 | PGSC0003DMT400070722 | 8.34 | 85809.46    | 2337        | 778                       | I     | √                 |
| StLRR-RLK008 | PGSC0003DMT400047024 | 6.31 | 93350.49    | 2547        | 848                       | XIV   | √                 |
| StLRR-RLK009 | PGSC0003DMT400047023 | 5.9  | 104893.65   | 2844        | 947                       | XIV   | √                 |
| StLRR-RLK010 | PGSC0003DMT400064038 | 6.17 | 109937.31   | 3000        | 999                       | IX    | √                 |
| StLRR-RLK011 | PGSC0003DMT400032797 | 5.43 | 57565.74    | 1557        | 518                       | XIII  |                   |
| StLRR-RLK012 | PGSC0003DMT400032784 | 6.59 | 72266.42    | 1965        | 654                       | VI    | √                 |
| StLRR-RLK013 | PGSC0003DMT400013077 | 5.46 | 108078      | 2946        | 981                       | IX    | √                 |
| StLRR-RLK014 | PGSC0003DMT400066225 | 5.7  | 84579.17    | 2316        | 771                       | VI    | √                 |
| StLRR-RLK015 | PGSC0003DMT400066706 | 5.7  | 101772.18   | 2829        | 942                       | XII   | √                 |
| StLRR-RLK016 | PGSC0003DMT400001921 | 8.42 | 95873.66    | 2646        | 881                       | II    | √                 |
| StLRR-RLK017 | PGSC0003DMT400008229 | 5.48 | 59599.29    | 1602        | 533                       | I     |                   |
| StLRR-RLK018 | PGSC0003DMT400046038 | 5.98 | 120786.63   | 3288        | 1095                      | XI    |                   |
| StLRR-RLK019 | PGSC0003DMT400026965 | 5.54 | 78155.21    | 2118        | 705                       | XI    |                   |
| StLRR-RLK020 | PGSC0003DMT400017876 | 8.9  | 67805.39    | 1839        | 612                       | VIII  | √                 |
| StLRR-RLK021 | PGSC0003DMT400026802 | 7.44 | 135400      | 3696        | 1231                      | XI    |                   |
| StLRR-RLK022 | PGSC0003DMT400026813 | 5.85 | 110318.24   | 2997        | 998                       | XI    |                   |
| StLRR-RLK023 | PGSC0003DMT400026824 | 6.12 | 119033.39   | 3249        | 1082                      | XI    | √                 |
| StLRR-RLK024 | PGSC0003DMT400026739 | 8.02 | 50686.58    | 1365        | 454                       | XI    |                   |
| StLRR-RLK025 | PGSC0003DMT400054594 | 5.78 | 112926.85   | 3138        | 1045                      | VI    |                   |
| StLRR-RLK027 | PGSC0003DMT400073238 | 6.22 | 86049.88    | 2319        | 772                       | XIII  |                   |
| StLRR-RLK028 | PGSC0003DMT400073093 | 7.56 | 69487.82    | 1878        | 625                       | XIII  | √                 |
| StLRR-RLK029 | PGSC0003DMT400073277 | 5.78 | 128315.38   | 3474        | 1157                      | XI    |                   |
| StLRR-RLK030 | PGSC0003DMT400073281 | 5.8  | 127905.39   | 3483        | 1160                      | XI    | √                 |
| StLRR-RLK031 | PGSC0003DMT400073105 | 6.37 | 56222.1     | 1506        | 501                       | XI    | √                 |
| StLRR-RLK032 | PGSC0003DMT400073110 | 6.41 | 124554.78   | 3390        | 1129                      | XI    |                   |
| StLRR-RLK033 | PGSC0003DMT400073117 | 6.43 | 59997.2     | 1629        | 542                       | XI    |                   |
| StLRR-RLK034 | PGSC0003DMT400073121 | 5.8  | 50702.53    | 1362        | 453                       | XI    |                   |
| StLRR-RLK035 | PGSC0003DMT400073122 | 6.59 | 125873.07   | 3432        | 1143                      | XI    | √                 |
| StLRR-RLK036 | PGSC0003DMT400073289 | 9.35 | 76357.88    | 2049        | 682                       | V     | √                 |
| StLRR-RLK037 | PGSC0003DMT400081228 | 5.02 | 109729.76   | 3003        | 1000                      | IX    | √                 |
| StLRR-RLK038 | PGSC0003DMT400057768 | 6.15 | 80821.61    | 2217        | 738                       | IV    | √                 |
| StLRR-RLK039 | PGSC0003DMT400043075 | 6.26 | 78531.17    | 2175        | 724                       | IV    |                   |
| StLRR-RLK040 | PGSC0003DMT400009133 | 5.84 | 122036.33   | 3384        | 1127                      | VI    | √                 |
| StLRR-RLK041 | PGSC0003DMT400078790 | 8.22 | 82417.14    | 2190        | 729                       | XIV   | √                 |
| StLRR-RLK042 | PGSC0003DMT400078706 | 6    | 111377.62   | 3054        | 1017                      | IX    | √                 |

|              |                      |      |           |      |      |      |   |
|--------------|----------------------|------|-----------|------|------|------|---|
| StLRR-RLK043 | PGSC0003DMT400078707 | 6.31 | 109316.02 | 2970 | 989  | IX   | √ |
| StLRR-RLK044 | PGSC0003DMT400064235 | 6.4  | 83530.7   | 2307 | 768  | VI   | √ |
| StLRR-RLK045 | PGSC0003DMT400026062 | 8.2  | 73829.36  | 1995 | 664  | XIII | √ |
| StLRR-RLK046 | PGSC0003DMT400003278 | 7.08 | 66231.82  | 1806 | 601  | VIII | √ |
| StLRR-RLK047 | PGSC0003DMT400052237 | 6.75 | 84708.29  | 2304 | 767  | I    | √ |
| StLRR-RLK048 | PGSC0003DMT400068787 | 6.4  | 132446.59 | 3615 | 1204 | XI   | √ |
| StLRR-RLK049 | PGSC0003DMT400068782 | 6.23 | 94319.89  | 2532 | 843  | XI   |   |
| StLRR-RLK050 | PGSC0003DMT400033367 | 5.28 | 109127.12 | 2988 | 995  | IX   | √ |
| StLRR-RLK051 | PGSC0003DMT400058132 | 5.69 | 122013.01 | 3369 | 1122 | VI   | √ |
| StLRR-RLK052 | PGSC0003DMT400043020 | 6.52 | 112033.93 | 3069 | 1022 | IX   | √ |
| StLRR-RLK053 | PGSC0003DMT400033662 | 7.62 | 68532.55  | 1884 | 627  | VI   | √ |
| StLRR-RLK054 | PGSC0003DMT400033657 | 8.55 | 96013.96  | 2625 | 874  | V    | √ |
| StLRR-RLK055 | PGSC0003DMT400032190 | 6.59 | 121647.08 | 3381 | 1126 | X    |   |
| StLRR-RLK057 | PGSC0003DMT400056093 | 6.66 | 67426.25  | 1815 | 604  | XIII | √ |
| StLRR-RLK058 | PGSC0003DMT400053483 | 5.95 | 94332.52  | 2577 | 858  | XI   |   |
| StLRR-RLK059 | PGSC0003DMT400031158 | 6.51 | 105214.14 | 2880 | 959  | XI   |   |
| StLRR-RLK060 | PGSC0003DMT400013468 | 7.58 | 69341.08  | 1908 | 635  | VI   | √ |
| StLRR-RLK061 | PGSC0003DMT400048524 | 6.47 | 111627.3  | 3048 | 1015 | IX   |   |
| StLRR-RLK062 | PGSC0003DMT400059219 | 8.03 | 74007.77  | 2037 | 678  | III  | √ |
| StLRR-RLK063 | PGSC0003DMT400079665 | 5.64 | 81860     | 2247 | 748  | IX   | √ |
| StLRR-RLK064 | PGSC0003DMT400037057 | 5.75 | 137825.63 | 3819 | 1272 | VIII | √ |
| StLRR-RLK065 | PGSC0003DMT400023418 | 8.3  | 68070.74  | 1878 | 625  | VI   | √ |
| StLRR-RLK066 | PGSC0003DMT400008336 | 6.41 | 123402.66 | 3348 | 1115 | IX   | √ |
| StLRR-RLK067 | PGSC0003DMT400008335 | 6.68 | 125019.36 | 3384 | 1127 | IX   | √ |
| StLRR-RLK068 | PGSC0003DMT400039527 | 6.81 | 117480.01 | 3189 | 1062 | XI   |   |
| StLRR-RLK069 | PGSC0003DMT400039509 | 5.94 | 68721.04  | 1827 | 608  | VI   | √ |
| StLRR-RLK070 | PGSC0003DMT400039213 | 8.01 | 71704.99  | 1980 | 659  | VI   | √ |
| StLRR-RLK071 | PGSC0003DMT400039198 | 9.37 | 71339.87  | 1917 | 638  | IX   | √ |
| StLRR-RLK072 | PGSC0003DMT400046807 | 5.75 | 120304.79 | 3324 | 1107 | IX   | √ |
| StLRR-RLK073 | PGSC0003DMT400065173 | 5.43 | 66998.64  | 1806 | 601  | X    | √ |
| StLRR-RLK074 | PGSC0003DMT400062915 | 8.53 | 67452.33  | 1815 | 604  | VI   |   |
| StLRR-RLK075 | PGSC0003DMT400063400 | 6.19 | 119818.03 | 3282 | 1093 | XII  | √ |
| StLRR-RLK076 | PGSC0003DMT400006692 | 5.94 | 87970.11  | 2370 | 789  | XIV  | √ |
| StLRR-RLK077 | PGSC0003DMT400058948 | 6.85 | 74635.62  | 2028 | 675  | VI   |   |
| StLRR-RLK078 | PGSC0003DMT400023732 | 5.89 | 76888.94  | 2136 | 711  | IV   | √ |
| StLRR-RLK079 | PGSC0003DMT400023733 | 5.8  | 119549.78 | 3267 | 1088 | VIII |   |
| StLRR-RLK080 | PGSC0003DMT400023681 | 6.29 | 120962.98 | 3315 | 1104 | IX   | √ |
| StLRR-RLK081 | PGSC0003DMT400023776 | 6.36 | 79588.67  | 2178 | 725  | VI   |   |
| StLRR-RLK082 | PGSC0003DMT400045887 | 6.87 | 80038.08  | 2166 | 721  | X    | √ |
| StLRR-RLK083 | PGSC0003DMT400007454 | 6.99 | 68835.02  | 1863 | 620  | XIII | √ |
| StLRR-RLK084 | PGSC0003DMT400075691 | 5.79 | 122615.25 | 3372 | 1123 | VIII | √ |
| StLRR-RLK086 | PGSC0003DMT400041350 | 6.2  | 125874.07 | 3399 | 1132 | XI   | √ |
| StLRR-RLK087 | PGSC0003DMT400060792 | 5.57 | 124680.95 | 3387 | 1128 | XI   | √ |
| StLRR-RLK088 | PGSC0003DMT400060788 | 6.37 | 124662.1  | 3381 | 1126 | XI   | √ |

|              |                      |      |           |      |      |      |   |
|--------------|----------------------|------|-----------|------|------|------|---|
| StLRR-RLK089 | PGSC0003DMT400060777 | 6.28 | 122066.88 | 3318 | 1105 | XI   | √ |
| StLRR-RLK090 | PGSC0003DMT400060766 | 6.51 | 124847.16 | 3396 | 1131 | XI   | √ |
| StLRR-RLK091 | PGSC0003DMT400060641 | 6.16 | 125477.1  | 3387 | 1128 | XI   | √ |
| StLRR-RLK092 | PGSC0003DMT400060712 | 5.43 | 86845.15  | 2358 | 785  | XI   | √ |
| StLRR-RLK095 | PGSC0003DMT400060535 | 5.42 | 60308.26  | 1647 | 548  | XI   |   |
| StLRR-RLK096 | PGSC0003DMT400019924 | 6.14 | 67129.62  | 1824 | 607  | XIII |   |
| StLRR-RLK097 | PGSC0003DMT400062730 | 5.11 | 55653.48  | 1506 | 501  | XI   |   |
| StLRR-RLK098 | PGSC0003DMT400010618 | 6.17 | 111533.82 | 3039 | 1012 | IX   | √ |
| StLRR-RLK099 | PGSC0003DMT400033720 | 6.02 | 114817.4  | 3177 | 1058 | VI   | √ |
| StLRR-RLK100 | PGSC0003DMT400050728 | 6.36 | 132090.37 | 3621 | 1206 | VIII | √ |
| StLRR-RLK101 | PGSC0003DMT400031288 | 8.39 | 111298.72 | 3030 | 1009 | IX   | √ |
| StLRR-RLK102 | PGSC0003DMT400063787 | 5.42 | 115560.62 | 3162 | 1053 | IX   |   |
| StLRR-RLK103 | PGSC0003DMT400016283 | 9.03 | 92085.19  | 2487 | 828  | IX   |   |
| StLRR-RLK104 | PGSC0003DMT400064535 | 5.99 | 118922.8  | 3267 | 1088 | IX   |   |
| StLRR-RLK105 | PGSC0003DMT400070819 | 5.74 | 70037.63  | 1905 | 634  | XIII |   |
| StLRR-RLK106 | PGSC0003DMT400045658 | 5.96 | 114370.12 | 3114 | 1037 | IX   | √ |
| StLRR-RLK107 | PGSC0003DMT400045667 | 8.46 | 88754.17  | 2415 | 804  | IX   |   |
| StLRR-RLK108 | PGSC0003DMT400071897 | 6.98 | 105507.67 | 2886 | 961  | IX   | √ |
| StLRR-RLK109 | PGSC0003DMT400071885 | 5.43 | 141000.29 | 3852 | 1283 | IX   |   |
| StLRR-RLK110 | PGSC0003DMT400071877 | 7.6  | 107738.12 | 2922 | 973  | IX   | √ |
| StLRR-RLK111 | PGSC0003DMT400016372 | 7.37 | 110998.74 | 3018 | 1005 | IX   | √ |
| StLRR-RLK112 | PGSC0003DMT400012744 | 5.83 | 108682.13 | 2955 | 984  | IX   | √ |
| StLRR-RLK113 | PGSC0003DMT400012733 | 7.77 | 106505.14 | 2868 | 955  | IX   | √ |
| StLRR-RLK114 | PGSC0003DMT400055412 | 8.77 | 90254.9   | 2457 | 818  | IX   | √ |
| StLRR-RLK115 | PGSC0003DMT400020520 | 8.73 | 74535.74  | 2016 | 671  | VI   | √ |
| StLRR-RLK116 | PGSC0003DMT400009520 | 6    | 118787.87 | 3306 | 1101 | VI   |   |
| StLRR-RLK117 | PGSC0003DMT400025747 | 6.27 | 108283.87 | 2949 | 982  | IX   | √ |
| StLRR-RLK118 | PGSC0003DMT400019446 | 7.89 | 68900.26  | 1866 | 621  | XIII | √ |
| StLRR-RLK119 | PGSC0003DMT400037779 | 8.42 | 73603.31  | 2022 | 673  | VI   | √ |
| StLRR-RLK120 | PGSC0003DMT400078542 | 6.18 | 77668.91  | 2145 | 714  | VI   | √ |
| StLRR-RLK121 | PGSC0003DMT400059346 | 5.12 | 138082.62 | 3768 | 1255 | IX   | √ |
| StLRR-RLK122 | PGSC0003DMT400045488 | 9.18 | 81654.03  | 2232 | 743  | I    | √ |
| StLRR-RLK123 | PGSC0003DMT400035108 | 8.7  | 36677.57  | 987  | 328  | XI   |   |
| StLRR-RLK124 | PGSC0003DMT400035086 | 6.12 | 66659.15  | 1803 | 600  | XIII | √ |
| StLRR-RLK125 | PGSC0003DMT400027924 | 6.14 | 97961.1   | 2628 | 875  | XIV  |   |
| StLRR-RLK126 | PGSC0003DMT400038616 | 6.77 | 73649.48  | 2049 | 682  | VI   |   |
| StLRR-RLK127 | PGSC0003DMT400008475 | 8.24 | 68289.56  | 1848 | 615  | VI   | √ |
| StLRR-RLK128 | PGSC0003DMT400035585 | 7.04 | 74694.66  | 2016 | 671  | VI   | √ |
| StLRR-RLK129 | PGSC0003DMT400018675 | 6.12 | 112744.05 | 3057 | 1018 | IX   | √ |
| StLRR-RLK130 | PGSC0003DMT400069725 | 7.8  | 89718.46  | 2475 | 824  | VI   |   |
| StLRR-RLK131 | PGSC0003DMT400059959 | 6.61 | 68977.84  | 1851 | 616  | XIII | √ |
| StLRR-RLK132 | PGSC0003DMT400010659 | 6.1  | 110043.91 | 3003 | 1000 | XI   |   |
| StLRR-RLK133 | PGSC0003DMT400053742 | 5.74 | 119331.88 | 3249 | 1082 | XI   | √ |
| StLRR-RLK134 | PGSC0003DMT400053703 | 5.94 | 64866.59  | 1773 | 590  | XI   |   |

|              |                      |      |           |      |      |      |   |
|--------------|----------------------|------|-----------|------|------|------|---|
| StLRR-RLK135 | PGSC0003DMT400053696 | 7.52 | 108781.19 | 2979 | 992  | XI   | √ |
| StLRR-RLK136 | PGSC0003DMT400053693 | 5.92 | 222859.21 | 6024 | 2007 | XI   | √ |
| StLRR-RLK137 | PGSC0003DMT400083940 | 6.36 | 95462.67  | 2589 | 862  | IX   |   |
| StLRR-RLK138 | PGSC0003DMT400077223 | 5.62 | 72589.85  | 1962 | 653  | I    | √ |
| StLRR-RLK139 | PGSC0003DMT400061545 | 7.58 | 92244.61  | 2574 | 857  | VI   |   |
| StLRR-RLK140 | PGSC0003DMT400042952 | 5.76 | 96557.87  | 2685 | 894  | VI   | √ |
| StLRR-RLK141 | PGSC0003DMT400070944 | 6.4  | 104693.97 | 2910 | 969  | VI   | √ |
| StLRR-RLK142 | PGSC0003DMT400070937 | 8.49 | 65611.99  | 1779 | 592  | VI   | √ |
| StLRR-RLK143 | PGSC0003DMT400067070 | 6.03 | 107734.48 | 2934 | 977  | IX   | √ |
| StLRR-RLK144 | PGSC0003DMT400012557 | 5.62 | 74959.41  | 2079 | 692  | IV   | √ |
| StLRR-RLK145 | PGSC0003DMT400074103 | 7.59 | 70824.05  | 1947 | 648  | VI   | √ |
| StLRR-RLK146 | PGSC0003DMT400083089 | 6.36 | 121763.77 | 3321 | 1106 | XII  | √ |
| StLRR-RLK147 | PGSC0003DMT400069633 | 9.28 | 70263.69  | 1878 | 625  | IX   | √ |
| StLRR-RLK148 | PGSC0003DMT400015087 | 5.38 | 107603.24 | 2937 | 978  | XII  |   |
| StLRR-RLK149 | PGSC0003DMT400078229 | 6.06 | 136161.1  | 3699 | 1232 | XI   | √ |
| StLRR-RLK150 | PGSC0003DMT400078298 | 9.14 | 69145.9   | 1890 | 629  | VI   | √ |
| StLRR-RLK151 | PGSC0003DMT400071183 | 8.39 | 67783.22  | 1842 | 613  | VIII | √ |
| StLRR-RLK152 | PGSC0003DMT400030886 | 6.14 | 105390.09 | 2880 | 959  | II   | √ |
| StLRR-RLK153 | PGSC0003DMT400090109 | 6.26 | 94503.8   | 2568 | 855  | V    | √ |
| StLRR-RLK154 | PGSC0003DMT400029141 | 6.28 | 103165.21 | 2823 | 940  | XI   |   |
| StLRR-RLK155 | PGSC0003DMT400028991 | 6.66 | 69706.84  | 1896 | 631  | XIII | √ |
| StLRR-RLK156 | PGSC0003DMT400070664 | 5.55 | 41345.9   | 1110 | 369  | VIII |   |
| StLRR-RLK157 | PGSC0003DMT400070666 | 6.83 | 52325.52  | 1401 | 466  | VIII |   |
| StLRR-RLK158 | PGSC0003DMT400048264 | 5.47 | 120673.37 | 3258 | 1085 | XI   | √ |
| StLRR-RLK159 | PGSC0003DMT400053338 | 6.86 | 130255.9  | 3543 | 1180 | XI   | √ |
| StLRR-RLK160 | PGSC0003DMT400054193 | 5.86 | 55532.2   | 1509 | 502  | XI   |   |
| StLRR-RLK161 | PGSC0003DMT400024732 | 8.47 | 72272.81  | 1944 | 647  | VI   | √ |
| StLRR-RLK162 | PGSC0003DMT400013987 | 5.52 | 111496.31 | 3075 | 1024 | XI   |   |
| StLRR-RLK163 | PGSC0003DMT400013991 | 5.79 | 83157.02  | 2253 | 750  | XI   |   |
| StLRR-RLK164 | PGSC0003DMT400024269 | 5.6  | 108655.33 | 2961 | 986  | IX   | √ |
| StLRR-RLK165 | PGSC0003DMT400044535 | 8.4  | 113290.28 | 3084 | 1027 | XIII | √ |
| StLRR-RLK166 | PGSC0003DMT400079864 | 6.3  | 122335.4  | 3330 | 1109 | IX   | √ |
| StLRR-RLK167 | PGSC0003DMT400032398 | 6.19 | 114990.42 | 3135 | 1044 | VIII | √ |
| StLRR-RLK168 | PGSC0003DMT400057117 | 6.74 | 63870.91  | 1698 | 565  | VI   | √ |
| StLRR-RLK169 | PGSC0003DMT400057334 | 5.55 | 118001.58 | 3252 | 1083 | IX   | √ |
| StLRR-RLK170 | PGSC0003DMT400056932 | 6.08 | 130150.94 | 3579 | 1192 | VIII |   |
| StLRR-RLK171 | PGSC0003DMT400032577 | 7.27 | 129676.28 | 3534 | 1177 | XI   |   |
| StLRR-RLK173 | PGSC0003DMT400048435 | 5.85 | 108946.29 | 2973 | 990  | IX   | √ |
| StLRR-RLK174 | PGSC0003DMT400019757 | 6.06 | 114643.67 | 3099 | 1032 | IX   | √ |
| StLRR-RLK175 | PGSC0003DMT400077438 | 7.04 | 76913     | 2058 | 685  | IX   | √ |
| StLRR-RLK176 | PGSC0003DMT400077419 | 8.77 | 65553.9   | 1752 | 583  | IX   |   |
| StLRR-RLK177 | PGSC0003DMT400077423 | 8.99 | 60620.38  | 1629 | 542  | IX   |   |
| StLRR-RLK178 | PGSC0003DMT400074940 | 6.6  | 105265.52 | 2841 | 946  | V    | √ |
| StLRR-RLK179 | PGSC0003DMT400075987 | 9.12 | 70064.44  | 1878 | 625  | VI   |   |

|              |                      |      |           |      |      |      |   |
|--------------|----------------------|------|-----------|------|------|------|---|
| StLRR-RLK180 | PGSC0003DMT400019705 | 6.87 | 89288.7   | 2424 | 807  | XI   |   |
| StLRR-RLK182 | PGSC0003DMT400050989 | 6.13 | 112689.73 | 3048 | 1015 | XI   | √ |
| StLRR-RLK184 | PGSC0003DMT400056576 | 6.49 | 109851.66 | 2949 | 982  | XI   |   |
| StLRR-RLK185 | PGSC0003DMT400056585 | 6.98 | 120063.42 | 3258 | 1085 | XI   | √ |
| StLRR-RLK186 | PGSC0003DMT400010103 | 5.88 | 75043.22  | 2058 | 685  | III  | √ |
| StLRR-RLK187 | PGSC0003DMT400010074 | 5.36 | 95830.85  | 2649 | 882  | VII  | √ |
| StLRR-RLK188 | PGSC0003DMT400031856 | 5.94 | 72397.38  | 1977 | 658  | I    | √ |
| StLRR-RLK189 | PGSC0003DMT400032061 | 6.56 | 70855.91  | 1929 | 642  | VI   | √ |
| StLRR-RLK190 | PGSC0003DMT400004363 | 5.76 | 102673.38 | 2787 | 928  | XIV  | √ |
| StLRR-RLK191 | PGSC0003DMT400034324 | 8.12 | 93585.44  | 2601 | 866  | VI   |   |
| StLRR-RLK192 | PGSC0003DMT400068892 | 5.39 | 102079.65 | 2817 | 938  | VII  |   |
| StLRR-RLK193 | PGSC0003DMT400022521 | 6.64 | 102359.65 | 2829 | 942  | XII  | √ |
| StLRR-RLK194 | PGSC0003DMT400045511 | 5.78 | 101134.11 | 2715 | 904  | XIV  | √ |
| StLRR-RLK195 | PGSC0003DMT400040874 | 6.21 | 72345.18  | 1992 | 663  | VI   | √ |
| StLRR-RLK196 | PGSC0003DMT400040886 | 5.14 | 122834.71 | 3390 | 1129 | IX   | √ |
| StLRR-RLK197 | PGSC0003DMT400022119 | 5.89 | 112453.2  | 3087 | 1028 | IX   | √ |
| StLRR-RLK198 | PGSC0003DMT400009696 | 5.18 | 133957.99 | 3660 | 1219 | IX   | √ |
| StLRR-RLK199 | PGSC0003DMT400030278 | 5.46 | 121917.98 | 3327 | 1108 | IX   | √ |
| StLRR-RLK200 | PGSC0003DMT400076250 | 5.65 | 133294.02 | 3693 | 1230 | IX   | √ |
| StLRR-RLK201 | PGSC0003DMT400053083 | 5.78 | 101356.77 | 2799 | 932  | XII  | √ |
| StLRR-RLK202 | PGSC0003DMT400055650 | 6.44 | 107429.1  | 2955 | 984  | VII  |   |
| StLRR-RLK203 | PGSC0003DMT400055685 | 5.2  | 134398.33 | 3711 | 1236 | VIII |   |
| StLRR-RLK204 | PGSC0003DMT400049957 | 6.69 | 86202.71  | 2316 | 771  | XI   | √ |
| StLRR-RLK205 | PGSC0003DMT400016636 | 6.7  | 112538.75 | 3030 | 1009 | XI   | √ |
| StLRR-RLK206 | PGSC0003DMT400045607 | 5.69 | 58697.8   | 1578 | 525  | XIII |   |
| StLRR-RLK207 | PGSC0003DMT400084287 | 8.87 | 61594.92  | 1686 | 561  | II   | √ |
| StLRR-RLK208 | PGSC0003DMT400071263 | 6.49 | 89986.23  | 2427 | 808  | XIV  |   |
| StLRR-RLK209 | PGSC0003DMT400080229 | 8.75 | 57396.72  | 1557 | 518  | XIV  |   |
| StLRR-RLK210 | PGSC0003DMT400021662 | 5.93 | 105974.27 | 2895 | 964  | XIV  | √ |
| StLRR-RLK211 | PGSC0003DMT400072330 | 5.49 | 102271.01 | 2805 | 934  | XII  | √ |
| StLRR-RLK212 | PGSC0003DMT400072512 | 8.45 | 87012.58  | 2358 | 785  | I    | √ |
| StLRR-RLK213 | PGSC0003DMT400021049 | 5.69 | 97775.52  | 2667 | 888  | IX   | √ |
| StLRR-RLK214 | PGSC0003DMT400040459 | 6.54 | 69643.63  | 1944 | 647  | VI   | √ |
| StLRR-RLK215 | PGSC0003DMT400041690 | 5.88 | 67557.22  | 1815 | 604  | XIII | √ |
| StLRR-RLK216 | PGSC0003DMT400002598 | 7.17 | 109987.58 | 3009 | 1002 | XI   | √ |
| StLRR-RLK217 | PGSC0003DMT400073837 | 5.73 | 101986.97 | 2817 | 938  | XII  | √ |
| StLRR-RLK218 | PGSC0003DMT400015538 | 6.57 | 124691.03 | 3393 | 1130 | XI   | √ |
| StLRR-RLK219 | PGSC0003DMT400023894 | 8.21 | 99645.33  | 2760 | 919  | IX   |   |
| StLRR-RLK220 | PGSC0003DMT400088620 | 7.6  | 33808.8   | 912  | 303  | XI   |   |
| StLRR-RLK221 | PGSC0003DMT400059857 | 6.46 | 103186.35 | 2814 | 937  | XI   |   |
| StLRR-RLK222 | PGSC0003DMT400059855 | 6.02 | 105512.21 | 2874 | 957  | IX   | √ |
| StLRR-RLK223 | PGSC0003DMT400050673 | 9.3  | 71927.95  | 1911 | 636  | VI   | √ |
| StLRR-RLK224 | PGSC0003DMT400007518 | 8.8  | 70212.2   | 1908 | 635  | VI   | √ |
| StLRR-RLK225 | PGSC0003DMT400000956 | 6.91 | 97414.65  | 2658 | 885  | IX   |   |

|              |                      |      |           |      |      |      |   |
|--------------|----------------------|------|-----------|------|------|------|---|
| StLRR-RLK226 | PGSC0003DMT400073675 | 6.06 | 102805.82 | 2775 | 924  | XIII |   |
| StLRR-RLK228 | PGSC0003DMT400074229 | 5.99 | 76594.76  | 2121 | 706  | IV   | √ |
| StLRR-RLK229 | PGSC0003DMT400012752 | 7.03 | 70643.21  | 1914 | 637  | I    |   |
| StLRR-RLK230 | PGSC0003DMT400059664 | 5.68 | 117817.32 | 3237 | 1078 | IX   | √ |
| StLRR-RLK231 | PGSC0003DMT400039968 | 6.34 | 98279.63  | 2667 | 888  | II   | √ |
| StLRR-RLK232 | PGSC0003DMT400075495 | 5.6  | 66379.23  | 1767 | 588  | VIII | √ |
| StLRR-RLK233 | PGSC0003DMT400075494 | 5.62 | 66119.04  | 1749 | 582  | VIII | √ |
| StLRR-RLK234 | PGSC0003DMT400043459 | 5.52 | 120560.59 | 3294 | 1097 | IX   | √ |
| StLRR-RLK235 | PGSC0003DMT400011891 | 6.14 | 100737.32 | 2766 | 921  | XII  | √ |
| StLRR-RLK236 | PGSC0003DMT400046218 | 6.94 | 70944.15  | 1959 | 652  | VI   | √ |
| StLRR-RLK237 | PGSC0003DMT400036257 | 7.21 | 47150.53  | 1290 | 429  | XI   |   |
| StLRR-RLK238 | PGSC0003DMT400036250 | 5.5  | 81576.79  | 2229 | 742  | XI   |   |
| StLRR-RLK239 | PGSC0003DMT400036243 | 6.58 | 57437.31  | 1551 | 516  | XI   |   |
| StLRR-RLK240 | PGSC0003DMT400049019 | 6.46 | 52661.88  | 1422 | 473  | XI   |   |
| StLRR-RLK241 | PGSC0003DMT400039007 | 7.04 | 47894.49  | 1284 | 427  | XI   |   |
| StLRR-RLK242 | PGSC0003DMT400077881 | 6.72 | 48251.92  | 1302 | 433  | XI   |   |
| StLRR-RLK243 | PGSC0003DMT400008826 | 5.91 | 66849.19  | 1815 | 604  | VI   | √ |
| StLRR-RLK244 | PGSC0003DMT400046446 | 8.83 | 48270.62  | 1311 | 436  | XI   |   |
| StLRR-RLK245 | PGSC0003DMT400097140 | 8.34 | 41708.37  | 1119 | 372  | XI   |   |
| StLRR-RLK246 | PGSC0003DMT400025493 | 8.43 | 73648.53  | 1998 | 665  | VI   | √ |

---
