# Supplementary material for: Identification and Characterization of LRR-RLK Family Genes in Potato Reveal Their Involvement in Peptide Signaling of Cell Fate Decisions and Biotic/Abiotic Stress Responses
Source: MDPI journal article supplement (doi:10.3390/cells7090120), 2018-08-27
Supplement: s1 [file s1]

**Sup File 4.** LRR motifs analysis in the LRR domain of identified potato LRR-RLK members

| LRR | 1        | 2 | 3   | 4          | 5 | 6 | 7   | 8 | 9 | 10       | 11  | 12 | 13       | 14 | 15 | 16       | 17  | 18       | 19       | 20 | 21       | 22 | 23  | 24  |
|-----|----------|---|-----|------------|---|---|-----|---|---|----------|-----|----|----------|----|----|----------|-----|----------|----------|----|----------|----|-----|-----|
| M02 | <u>G</u> | x | I   | P/s        | x | e | I/l | G | n | L        | x   | x  | <u>L</u> | x  | x  | L        | d   | <u>L</u> | S        | x  | <u>N</u> | n  | L/f | T/s |
| M03 | <u>G</u> | x | I   | <u>P</u>   | x | x | I/L | g | x | L/c      | x   | x  | <u>L</u> | x  | x  | <u>L</u> | x   | L        | x        | N  | <u>N</u> | x  | L/f | s/t |
| M04 | <u>G</u> | x | I   | <u>P</u>   | x | x | i/l | x | n | L        | x   | x  | <u>L</u> | x  | x  | <u>L</u> | n   | <u>L</u> | q/s      | n  | <u>N</u> | x  | L/f | S/t |
| M06 | <u>G</u> | x | I/l | <u>P</u>   | x | e | I/i | G | x | l        | x   | s  | <u>L</u> | x  | x  | <u>L</u> | D   | <u>L</u> | S        | x  | <u>N</u> | x  | L/F | T/s |
| M07 | <u>G</u> | x | I   | <u>P</u>   | x | s | L/f | G | x | L        | x   | x  | <u>L</u> | x  | x  | <u>L</u> | x   | <u>L</u> | s        | x  | <u>N</u> | x  | L   | S   |
| M08 | <u>G</u> | x | I   | <u>P</u>   | x | E | I/L | G | x | L        | x   | x  | <u>L</u> | x  | x  | <u>L</u> | x   | <u>L</u> | x        | x  | <u>N</u> | x  | L/f | T   |
| M09 | <u>G</u> | x | I   | <u>P</u>   | x | x | I/l | g | x | L        | x   | x  | <u>L</u> | x  | x  | <u>L</u> | x   | L        | x        | x  | <u>N</u> | x  | L/f | S   |
| M10 | <u>G</u> | x | I   | <u>P</u>   | x | s | I   | G | n | L        | x   | x  | <u>L</u> | e  | x  | L        | n/d | L        | S        | x  | <u>N</u> | x  | L/F | s   |
| M11 | <u>G</u> | x | I   | <u>P</u>   | x | s | L/I | G | n | C        | x   | S  | <u>L</u> | x  | x  | L        | x   | <u>L</u> | s        | x  | <u>N</u> | x  | L   | S   |
| M12 | <u>G</u> | x | I   | <u>P</u>   | x | e | I/f | G | x | <u>L</u> | x   | x  | <u>L</u> | x  | v  | <u>L</u> | d   | <u>L</u> | x        | x  | <u>N</u> | n  | L/f | S   |
| M13 | <u>G</u> | x | I   | <u>P</u>   | x | e | I/i | G | k | I/f      | x   | x  | <u>L</u> | x  | x  | <u>L</u> | d   | L        | <u>S</u> | x  | <u>N</u> | x  | L   | T   |
| M14 | <u>G</u> | x | I/l | <u>P</u>   | x | x | i/l | G | x | L        | x   | x  | <u>L</u> | x  | x  | L        | D   | L        | S        | x  | <u>N</u> | x  | L/F | S/t |
| M15 | <u>G</u> | x | I   | <u>P</u>   | x | s | L/I | G | x | L        | x   | x  | <u>L</u> | x  | x  | <u>L</u> | x   | L        | x        | x  | <u>N</u> | x  | L/F | S   |
| M16 | <u>G</u> | x | I/l | <u>P</u>   | p | x | L   | C | s | g        | x   | k  | <u>L</u> | x  | x  | L        | i   | L        | x        | x  | <u>N</u> | x  | L/F | t   |
| M23 | <u>G</u> | x | I/l | <u>P</u>   | x | x | L   | g | x | L        | x   | x  | <u>L</u> | x  | x  | L        | x   | L        | x        | x  | <u>N</u> | x  | L/F | s/t |
| M24 | <u>G</u> | x | I   | <u>P</u>   | x | x | L   | g | x | L        | x   | x  | <u>L</u> | x  | x  | L        | D/n | L        | S        | x  | <u>N</u> | x  | L/F | t   |
| M25 | <u>G</u> | x | I   | <u>P</u>   | x | x | I   | G | n | l        | x   | x  | L        | x  | x  | L        | D   | L        | S        | x  | <u>N</u> | x  | L/f | s   |
| M26 | <u>G</u> | x | I/l | <u>P</u>   | x | x | L   | g | n | L        | t/s | x  | L        | x  | x  | L        | d   | L        | s        | n  | <u>N</u> | n  | L/f | S   |
| M27 | <u>G</u> | x | I/l | <u>P</u>   | x | e | L/i | G | n | l        | x   | n  | L        | x  | x  | <u>L</u> | x   | L        | x        | x  | <u>N</u> | x  | L/f | s   |
| M28 | <u>G</u> | x | I   | <u>P</u>   | x | x | I/l | G | n | l        | x   | x  | <u>L</u> | x  | x  | l        | d   | L        | s        | x  | <u>N</u> | x  | L/F | S/t |
| M29 | <u>G</u> | x | I/L | <u>P</u>   | x | E | l   | G | N | C        | x   | s  | <u>L</u> | x  | x  | L        | d/n | L        | S        | x  | <u>N</u> | x  | L/F | s   |
| M30 | <u>G</u> | x | I   | <u>P</u>   | P | e | I/l | g | x | L        | x   | n  | L        | x  | x  | L        | x   | L        | x        | x  | <u>N</u> | n  | F/L | T   |
| M32 | <u>G</u> | x | I/l | <u>P</u>   | x | x | i/l | x | x | L        | s   | x  | <u>L</u> | x  | x  | L        | D   | L        | S        | x  | <u>N</u> | x  | L/f | x   |
| M33 | <u>G</u> | s | I/L | <u>P/s</u> | x | x | I/i | x | x | L        | x   | s  | <u>L</u> | x  | x  | L        | x   | L        | x        | n  | <u>N</u> | x  | L/F | S   |
| M34 | <u>G</u> | x | I   | <u>P</u>   | x | e | L/I | g | x | C        | x   | x  | <u>L</u> | x  | x  | L        | d   | L        | S        | x  | <u>N</u> | x  | L   | s   |
| M35 | <u>G</u> | x | I   | <u>P</u>   | x | e | I   | G | N | L        | x   | x  | <u>L</u> | x  | x  | L        | x   | L        | s        | x  | <u>N</u> | x  | L/F | S   |
| M36 | <u>G</u> | x | I   | <u>P</u>   | x | x | I/f | g | n | x        | x   | x  | <u>L</u> | x  | x  | L/f      | D/n | L        | S        | x  | <u>N</u> | x  | L/f | S   |
| M37 | <u>G</u> | e | i/l | <u>P</u>   | x | e | i/l | G | x | L        | x   | x  | <u>L</u> | x  | x  | L        | d   | L        | x        | x  | <u>N</u> | x  | F/l | S   |
| M38 | <u>G</u> | x | I   | <u>P</u>   | x | e | L/i | G | x | L        | x   | x  | <u>L</u> | x  | x  | <u>L</u> | d   | L        | s        | x  | <u>N</u> | x  | L   | S/t |

Note: The sequence conservation of LRR motif at each position was measured by bits. If the bits value of the amino acid at certain position is less than 0.5, such position would be represented with x;  $1 > \text{bits} \geq 0.5$ , with lowercase;  $2 > \text{bits} \geq 1$ , with capital letter;  $3 > \text{bits} \geq 2$ , with bold capital;  $\text{bits} \geq 3$ , with underlined capital letter in bold.
